# Supplementary material for: BM-MSCs display altered gene expression profiles in B-cell acute lymphoblastic leukemia niches and exert pro-proliferative effects via overexpression of IFI6
Source: Springer Nature journal article supplement (doi:10.1186/s12967-023-04464-1), 2023-09-05

**A**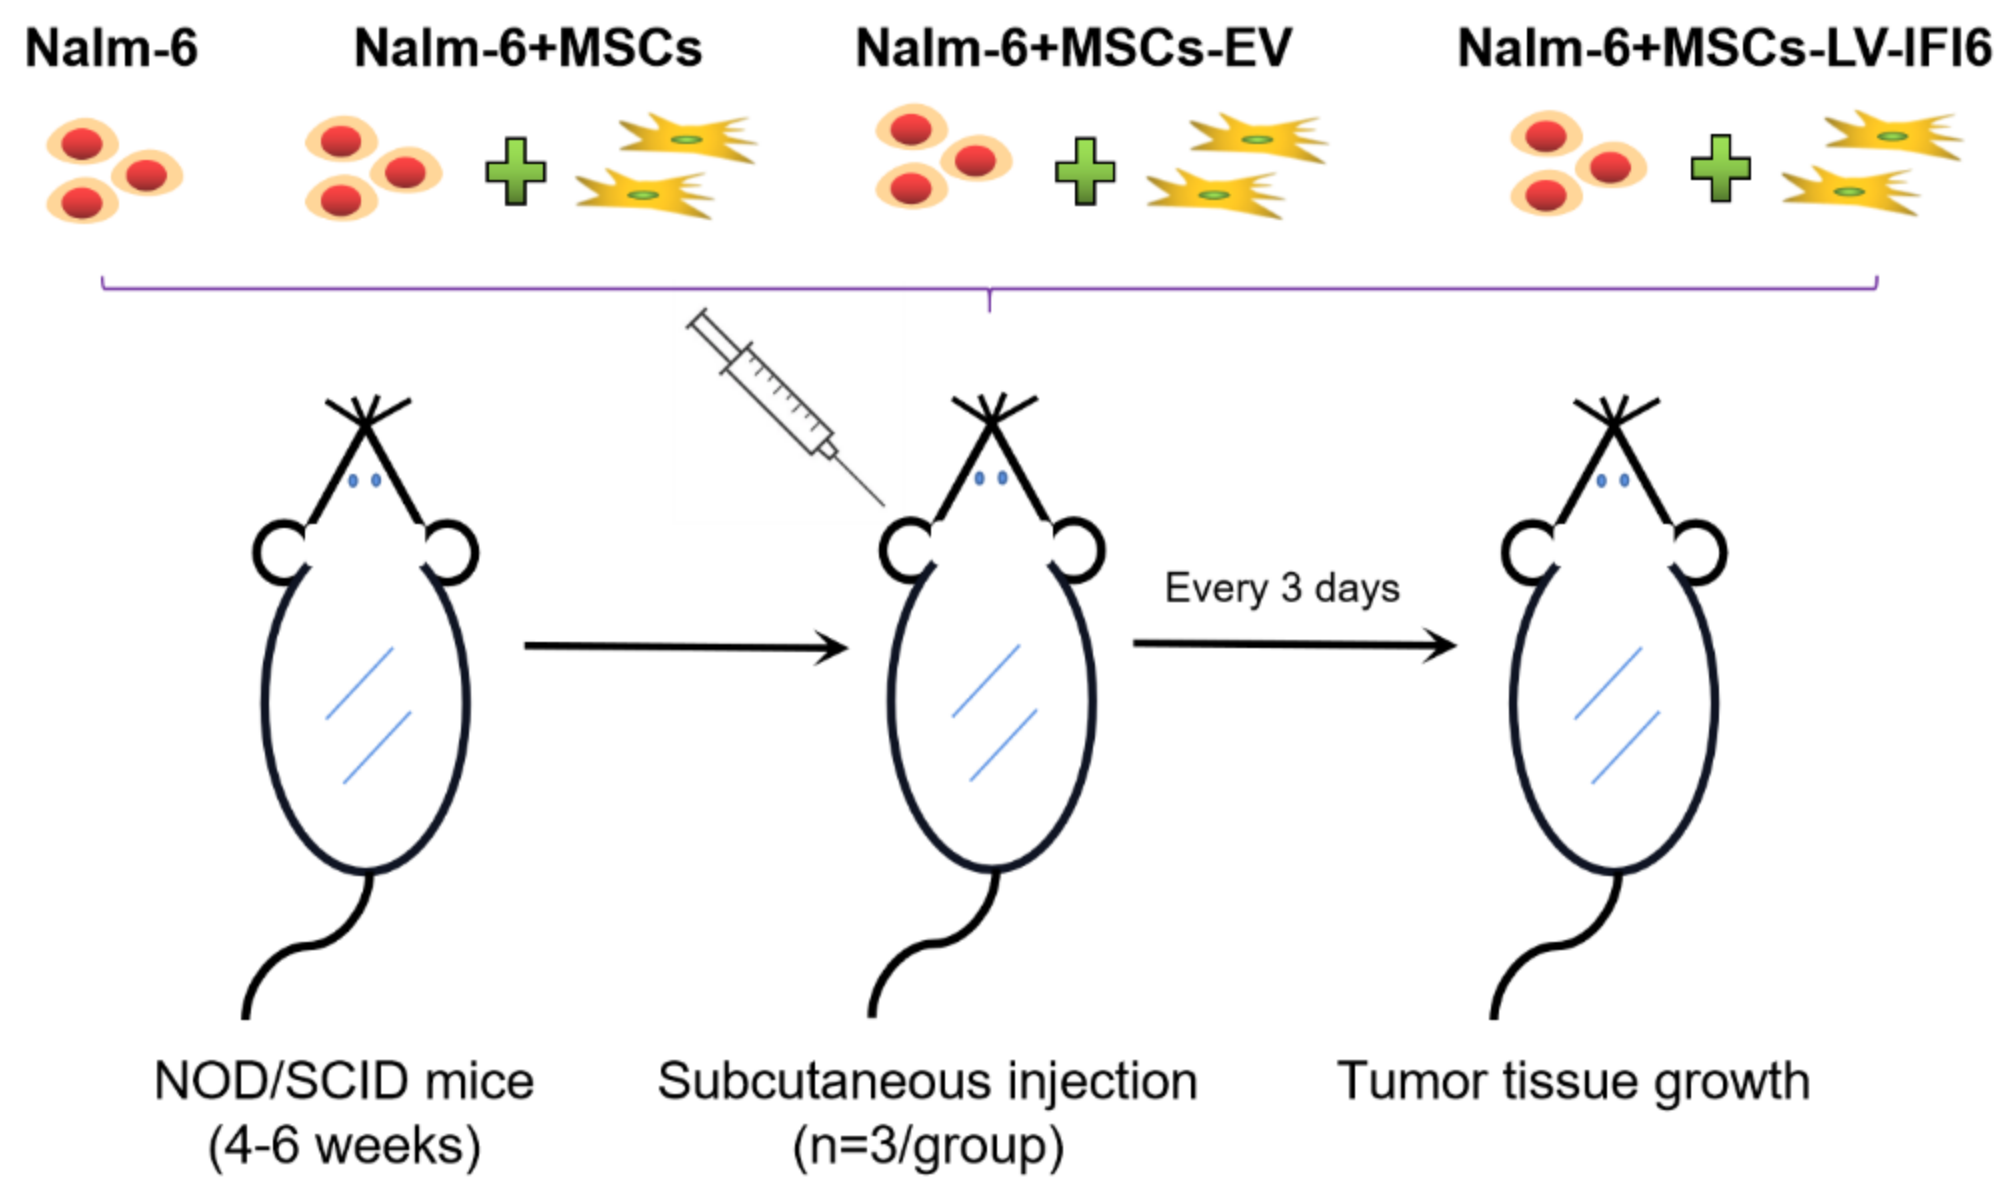**B**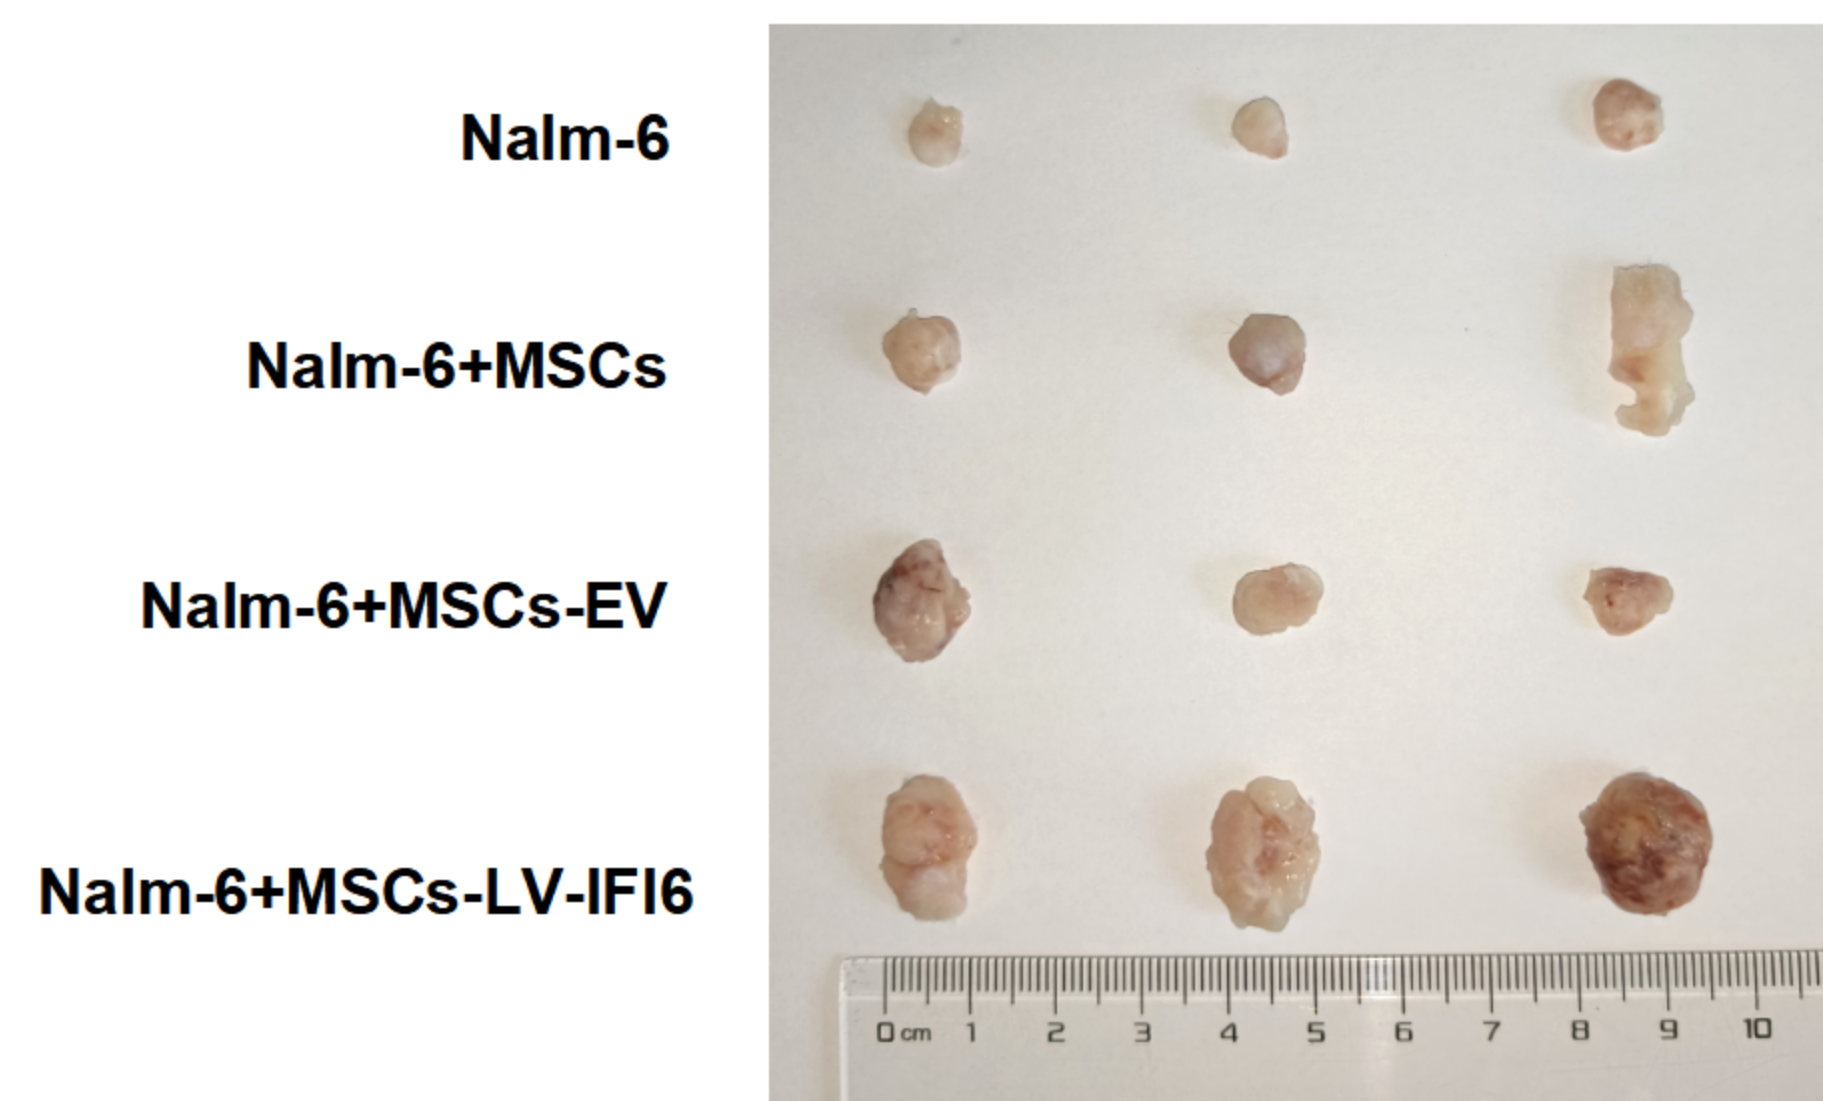**C**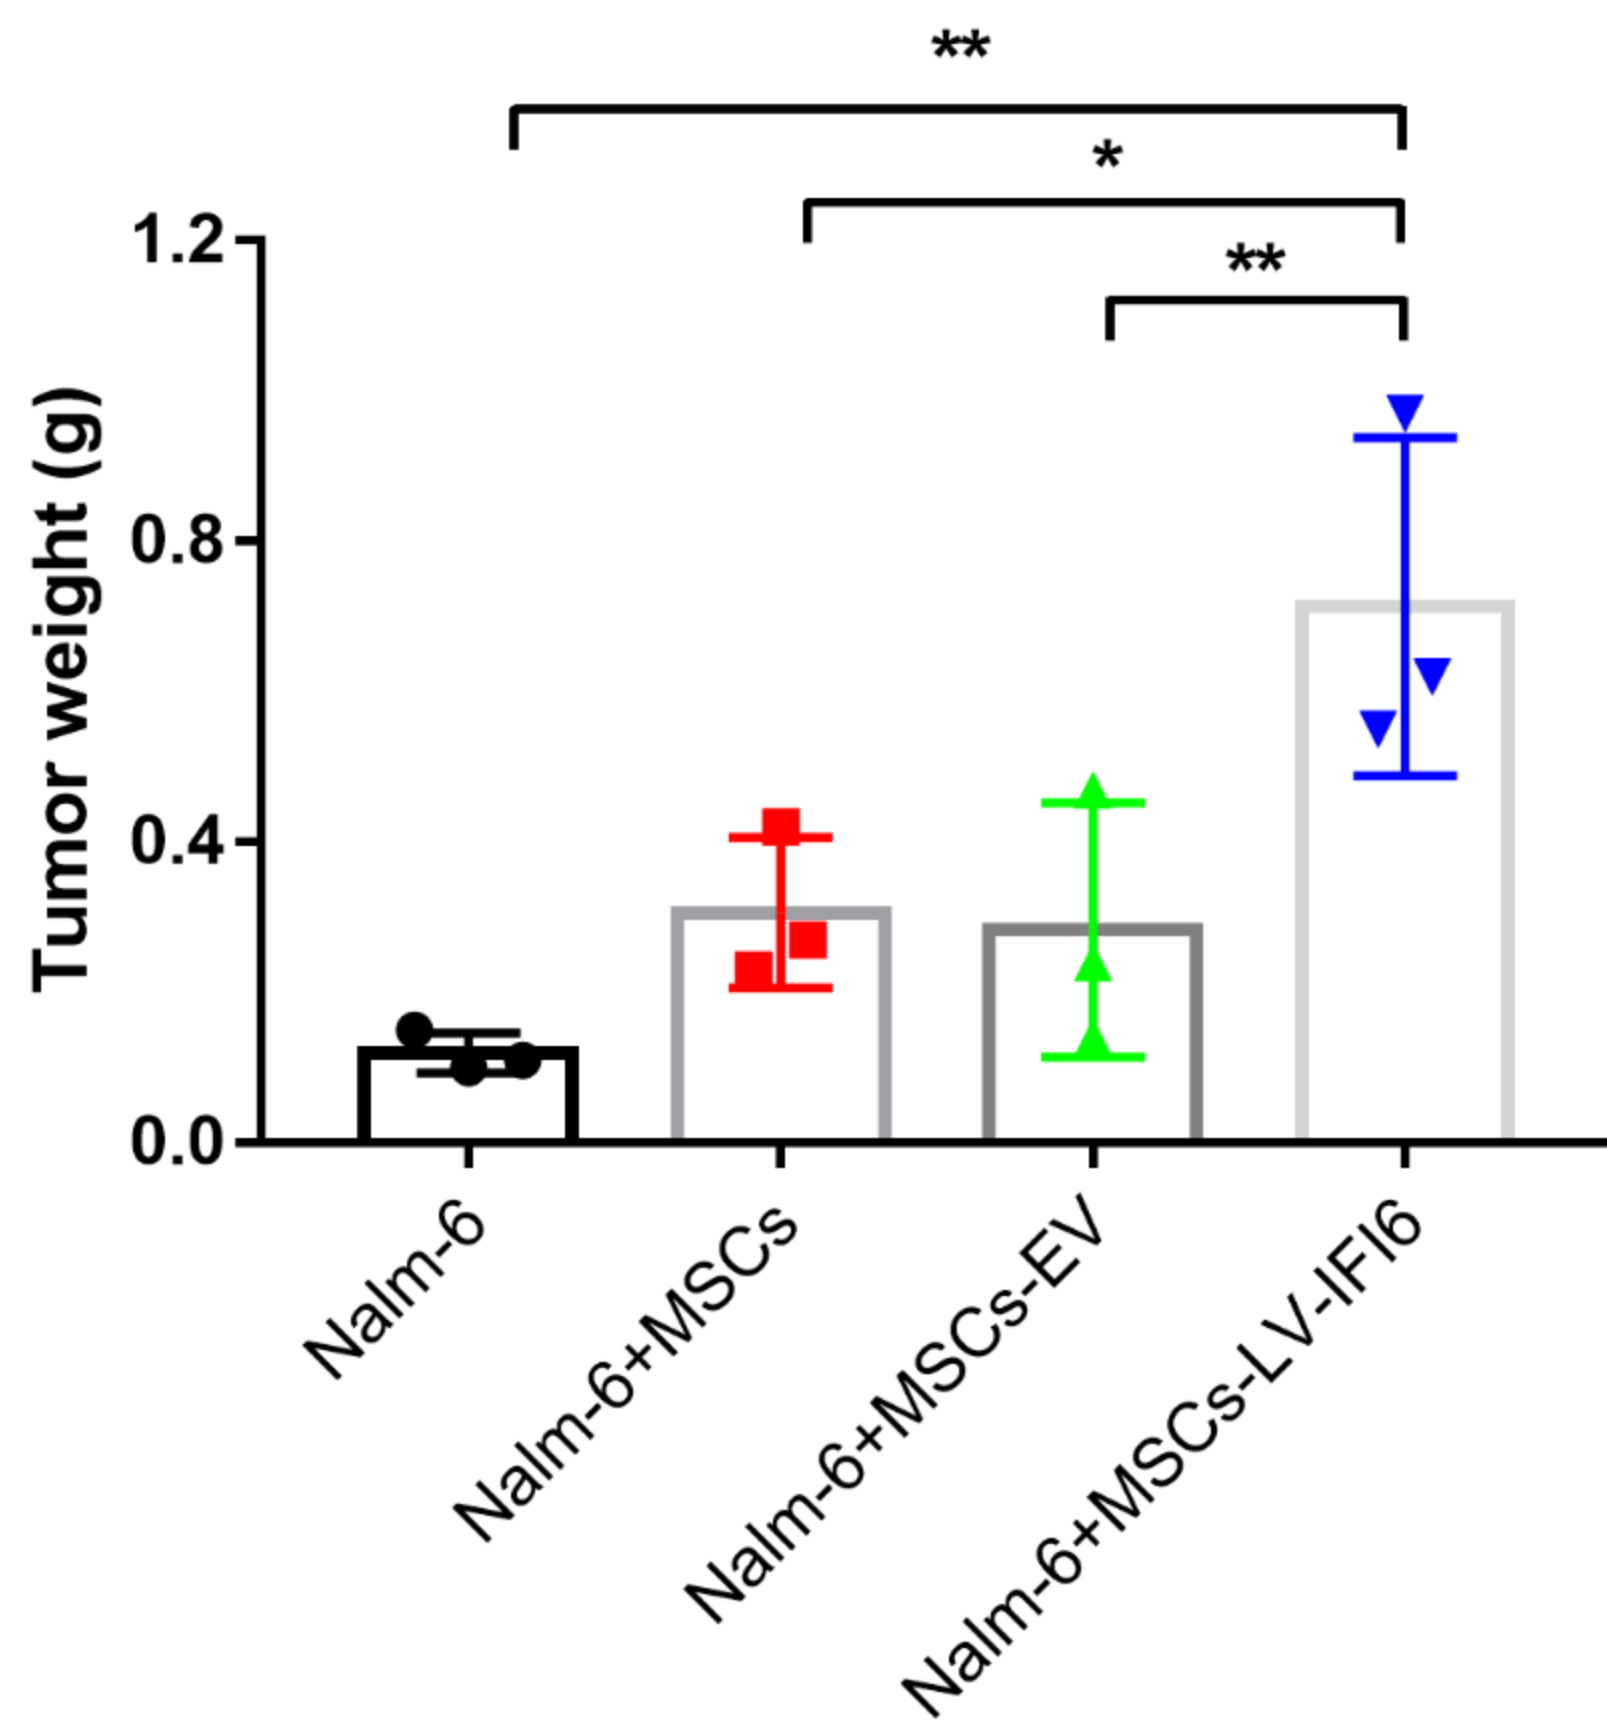**D**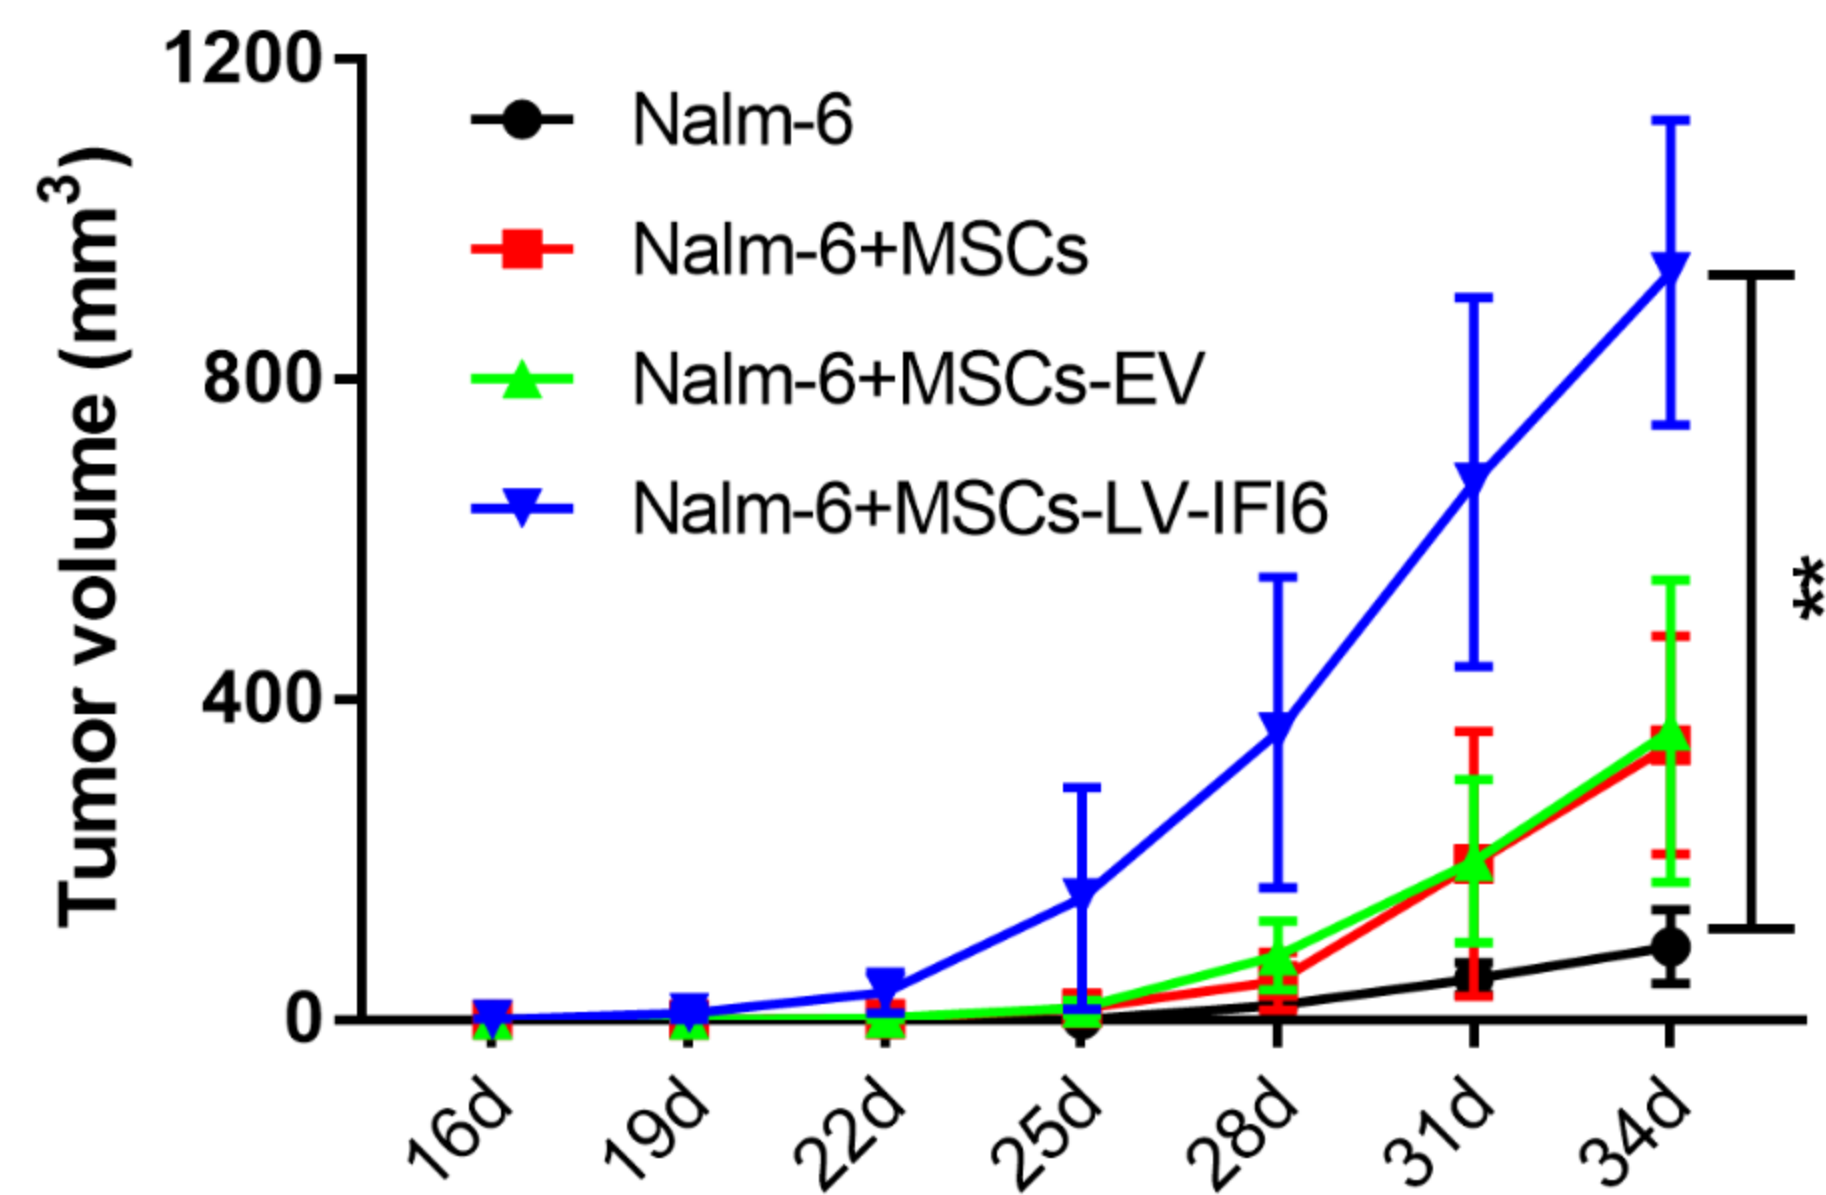

Supplement: MOESM3 [file 26008980]
