# Supplementary material for: BM-MSCs display altered gene expression profiles in B-cell acute lymphoblastic leukemia niches and exert pro-proliferative effects via overexpression of IFI6
Source: Springer Nature journal article supplement (doi:10.1186/s12967-023-04464-1), 2023-09-05

**A****Nalm-6**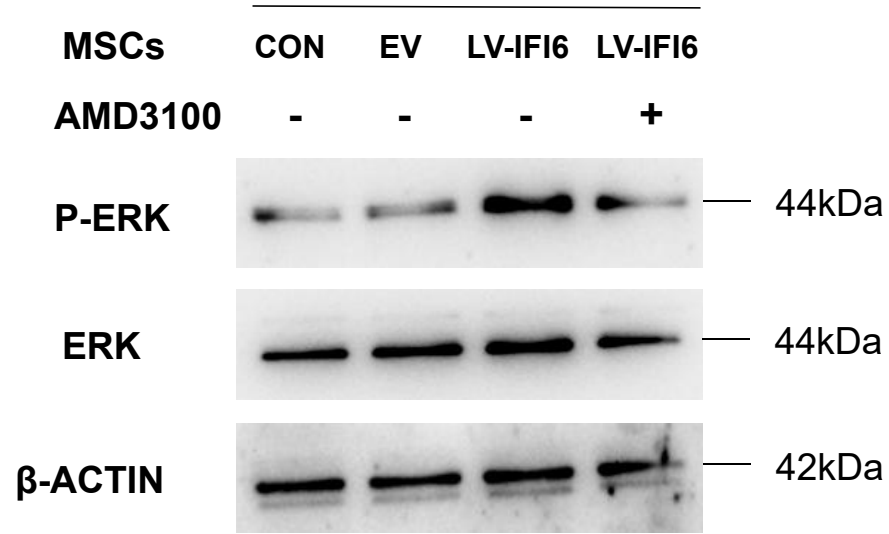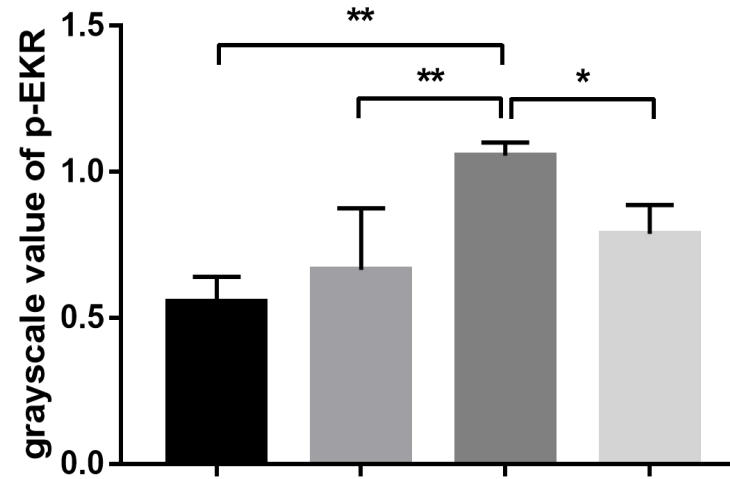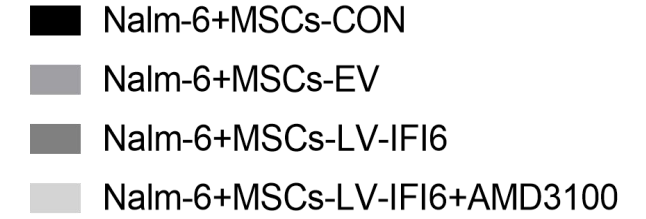**B****RS4;11**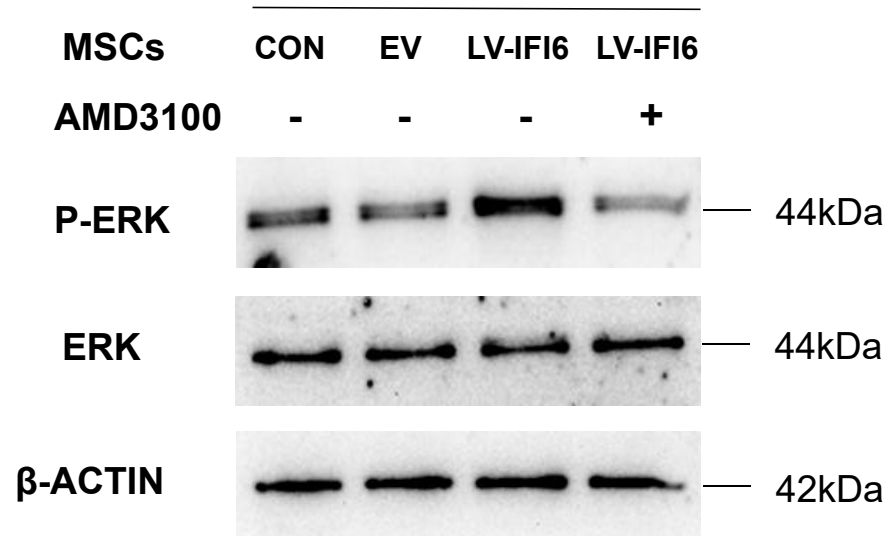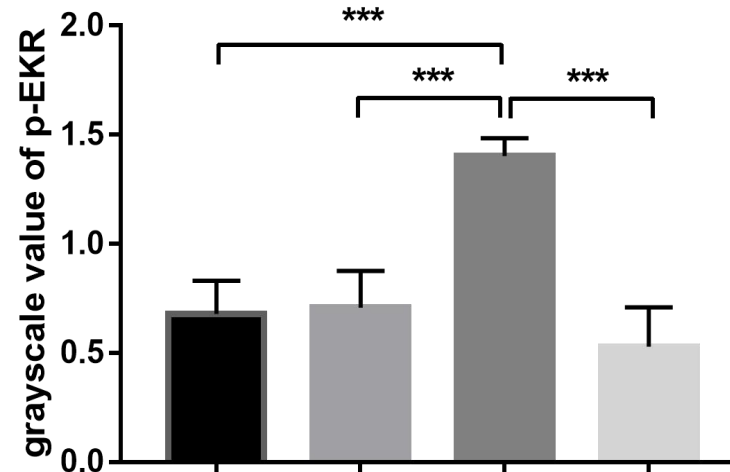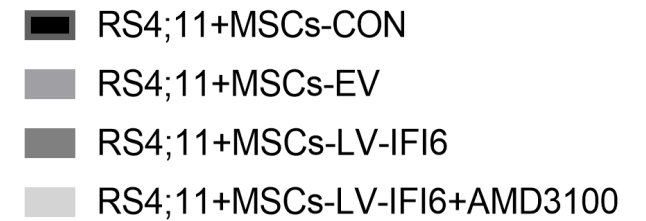

Supplement: MOESM4 [file 26008980]
